RESEARCH ARTICLE

# Establishment a real-time reverse transcription PCR based on host biomarkers for the detection of the subclinical cases of *Mycobacterium avium* subsp. *paratuberculosis*

Hyun-Eui Park<sup>1</sup>, Hong-Tae Park<sup>1</sup>, Young Hoon Jung<sup>2</sup>, Han Sang Yoo<sup>1,3\*</sup>

**1** Department of Infectious Disease, College of Veterinary Medicine, Seoul National University, Seoul, Republic of Korea, **2** Department of Animal Resources Development, National Institute of Animal Science, Rural Development Administration, Cheonan, Republic of Korea, **3** Institute of Green Bio Science and Technology, Seoul National University, Pyeongchang, Republic of Korea

\* [yoohs@snu.ac.kr](mailto:yoohs@snu.ac.kr)

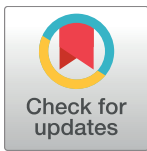

**OPEN ACCESS**

**Citation:** Park H-E, Park H-T, Jung YH, Yoo HS (2017) Establishment a real-time reverse transcription PCR based on host biomarkers for the detection of the subclinical cases of *Mycobacterium avium* subsp. *paratuberculosis*. PLoS ONE 12(5): e0178336. <https://doi.org/10.1371/journal.pone.0178336>

**Editor:** Yung-Fu Chang, Cornell University, UNITED STATES

**Received:** February 5, 2017

**Accepted:** May 1, 2017

**Published:** May 25, 2017

**Copyright:** © 2017 Park et al. This is an open access article distributed under the terms of the [Creative Commons Attribution License](https://creativecommons.org/licenses/by/4.0/), which permits unrestricted use, distribution, and reproduction in any medium, provided the original author and source are credited.

**Data Availability Statement:** All datasets used in selection of the biomarkers are available at Gene Expression Omnibus (GEO) (<http://www.ncbi.nlm.nih.gov/geo/>) under accession number GSE62836, <http://dx.doi.org/10.4014/jmb.1302.02021>, and <http://dx.doi.org/10.4014/jmb.1408.08059>.

**Funding:** This work was supported by the Cooperative Research Program for Agriculture Science & Technology Development (Project No.

## Abstract

Bovine paratuberculosis (PTB) is a chronic enteric inflammatory disease of ruminants caused by *Mycobacterium avium* subsp. *paratuberculosis* (MAP) that causes large economic losses in the dairy industry. Spread of PTB is mainly provoked by a long subclinical stage during which MAP is shed into the environment with feces; accordingly, detection of subclinical animals is very important to its control. However, current diagnostic methods are not suitable for detection of subclinical animals. Therefore, the current study was conducted to develop a diagnostic method for analysis of the expression of genes of prognostic potential biomarker candidates in the whole blood of cattle naturally infected with MAP. Real-time PCR with nine potential biomarker candidates was developed for the diagnosis of MAP subclinical infection. Animals were divided into four groups based on fecal MAP PCR and serum ELISA. Eight genes (*Timp1*, *Hp*, *Serpine1*, *Tfrc*, *Mmp9*, *Defb1*, *Defb10*, and *S100a8*) were up-regulated in MAP-infected cattle ( $p < 0.05$ ). Moreover, ROC analysis revealed that eight genes (*Timp1*, *Hp*, *Serpine1*, *Tfrc*, *Mmp9*, *Defb1*, *Defb10*, and *S100a8*) showed fair diagnostic performance ( $AUC \geq 0.8$ ). Four biomarkers (*Timp1*, *S100a8*, *Defb1*, and *Defb10*) showed the highest diagnostic accuracy in the PCR positive and ELISA negative group (PN group) and three biomarkers (*Tfrc*, *Hp*, and *Serpine1*) showed the highest diagnostic accuracy in the PCR negative and ELISA positive group (NP group). Moreover, three biomarkers (*S100a8*, *Hp*, and *Defb10*) were considered the most reliable for the PCR positive and ELISA positive group (PP group). Taken together, our data suggest that real-time PCR based on eight biomarkers (*Timp1*, *Hp*, *Serpine1*, *Tfrc*, *Mmp9*, *Defb1*, *Defb10*, and *S100a8*) might be useful for diagnosis of JD, including subclinical stage cases.

PJ00897001) to HSY, Rural Development Administration, National Research Foundation (No. 2014R1A2A2A01007291) to HSY, BK21 PLUS to HSY and the Research Institute for Veterinary Sciences, Seoul National University, Republic of Korea to HSY. The funders had no role in study design, data collection and analysis, decision to publish, or preparation of the manuscript.

**Competing interests:** The authors have declared that no competing interests exist.

## Introduction

Johne's disease (JD) is a chronic inflammatory disease of the gastrointestinal tract of ruminants with granulomatous lesions that is caused by *Mycobacterium avium* subsp. *paratuberculosis* (MAP) (Whitlock *et al.*, 1996). Johne's disease can be divided into four stages depending on the clinical signs and MAP shedding levels including the silent, subclinical, clinical, and advanced clinical stage [1]. In the silent stage, the infected animals do not show any clinical sign or excrete MAP into the environment [2]. During the subclinical stage, animals still do not have clinical symptoms; however, they shed low numbers of MAP into environment, which can be circulated in the herd and infect other animals [2]. After subclinical stage, animals enter clinical stage and start to show clinical signs such as gradual weight loss, diarrhea, and decreased milk production [2]. Finally, animals become cachectic and lethargic in advanced clinical stage [2]. Accordingly, it is very important to remove animals in the subclinical stage to control the disease. However, current diagnostic methods are insufficient for diagnosis of subclinical stages of disease [3]. Although fecal culture has been considered a gold standard for the diagnosis of MAP [4], this method is time-consuming and shows low sensitivity, especially in subclinical stages of the disease [5, 6]. PCR allows rapid detection of MAP in clinical samples such as feces, milk and blood [7]; however, PCR-based methods are also limited in their usefulness for diagnosis of subclinical stages of disease because of the low sensitivity [8] and low specificity caused by genetic similarities with other mycobacteria [9, 10]. Although ELISA has been used for detection of antibodies to MAP in clinical samples such as serum and milk, this method is also inadequate for diagnosis of fecal shedders in the subclinical stage, especially in 1–2 year old cattle [11]. Therefore, new diagnostic tools have been requested to detect MAP-infected animals at early stage of infection.

Biomarkers, which are considered indicators of specific pathogenic conditions or therapeutic responses to treatment [12], are commonly used as diagnostic tools for various diseases [13–16]. Recently, host biomarkers discovered using transcriptomics, metabolomics, and proteomics have been proposed as alternative diagnostic methods for paratuberculosis [17–20]. Biomarkers indicating early stages of MAP-infection were proposed by analyzing gene expression profiles of blood in cattle with experimental MAP infection [17, 18]. A metabolic profiling in cattle with experimental infection of MAP revealed that four metabolites (iso-butyrate, branched chain amino acids, leucine, and isoleucine) were increased in serum of the MAP-infected cattle while citrate was decreased [19]. Moreover, six proteins (transferrin, gelsolin isoforms  $\alpha$  &  $\beta$ , complement subcomponent C1r, complement component C3, amine oxidase-copper containing 3, and coagulation factor II) were proposed as biomarkers after they were found to increase by at least 2-fold in MAP-infected cattle, as were two proteins (coagulation factor XIII-B polypeptide, and fibrinogen  $\gamma$  chain and its precursor) that were reduced by nearly two-fold in MAP-infected cattle [20]. Our previous studies also proposed several biomarkers that were up-regulated in MAP infected macrophages, mice, and cattle [21–23]. Transcriptional profiles of MAP-infected macrophage RAW 264.7 cells and a mouse model suggested five and three genes as prognostic biomarkers, respectively [21, 22].  $\beta$ -defensins were also suggested as prognostic biomarkers in subclinical animals of MAP-naturally infected cattle [23]. However, application of those biomarkers for diagnosis of JD has yet to be investigated. Therefore, we developed a real-time PCR method using the biomarkers for diagnosis of bovine paratuberculosis by measuring the gene expression level of several biomarkers in whole blood.

## Materials and methods

### Experimental design and animals

About 300 Holstein cattle were raised on the national farm in Cheonan city which located in mid-west region of the South Korea. The cattle were regularly tested for absence of JD two times per year using fecal PCR and serum ELISA. A total of three to eight year old fourty-four cows were selected for further analysis after detection of MAP-specific antibodies using a commercial ELISA kit (IDEXX Laboratories, Inc., Westbrook, ME, USA) and MAP in the feces by PCR [24]. The detection was performed four times with a 6-month interval to enable accurate classification of infection status. The animals were divided into the following groups based on the results of PCR and ELISA: NN, ELISA and PCR negative; PN, ELISA negative and PCR positive; NP, ELISA positive and PCR negative; PP, ELISA positive and PCR positive. All animal procedures were approved by the National Institute of Animal Science (2013–046). Detailed characteristics of study subjects are shown in [Table 1](#).

### Selection of biomarker candidates

Nine genes that were significantly up-regulated in MAP infected macrophages, mice, and cattle were selected for use as diagnostic biomarkers based on our previous studies ([Table 2](#)) [21–23, 25]. All datasets used in selection of the biomarkers are available at Gene Expression Omnibus (GEO) (<http://www.ncbi.nlm.nih.gov/geo> website) under accession number GSE62836, <http://dx.doi.org/10.4014/jmb.1302.02021>, and <http://dx.doi.org/10.4014/jmb.1408.08059>.

### Extraction of total RNA from blood

Peripheral blood was collected from the tail vein of cattle using a BD Vacutainer<sup>®</sup> Plus Plastic K<sub>2</sub>EDTA Tubes. A total of 125  $\mu$ l of whole blood was then mixed with 125  $\mu$ l of RNase-free water and 750  $\mu$ l of Trizol LS reagent (Ambion) and incubated at room temperature for 5 min. Next, 200  $\mu$ l of chloroform was added to the mixture and it was centrifuged at 13,523 g and 4°C for 15 min. The supernatant was subsequently transferred to an RNeasy column (Qiagen, Hilden, Germany) and centrifuged at 8,500 g for 15 sec. After washing, RNA was eluted in 30  $\mu$ l of RNase-free water and immediately stored at -80°C until use.

### Optimization of primer and probe concentrations

The optimal concentration of primer and probe concentration was determined with an identical cDNA template for each biomarker gene. Three concentrations (0.5 $\mu$ M, 0.75 $\mu$ M, 1 $\mu$ M) of both forward and reverse primers with a constant probe concentration were tested. The combination showing the highest fluorescence value was tested at three different concentrations of the probe (0.1 $\mu$ M, 0.2 $\mu$ M, 0.3 $\mu$ M). For further experiment, primer and probe concentration that showing the highest fluorescence value was selected.

### Real-time PCR

Total RNA was employed to prepare cDNA with random primers using a QuantiTect<sup>®</sup> Reverse Transcription Kit (Qiagen Inc., Valencia, CA, USA) according to the manufacturer's instructions. The expression of nine biomarker genes was measured by quantitative real time RT-PCR, which was conducted using a Rotor-Gene multiplex PCR kit (Qiagen Inc). In brief, total of 18 $\mu$ l reaction mixture was prepared consists of 10 $\mu$ l Master mix, RNase-free water, 0.5 $\mu$ M forward and reverse primers, and 0.1 $\mu$ M probe for each of the biomarker genes. After that, 2 $\mu$ l of cDNA template was added to a final volume of 20 $\mu$ l. The specificity of the primers

**Table 1. Characteristics of study subjects.**

| Number of subjects |                 | All (n = 44) | NN group (n = 11) | PN group (n = 12) | NP group (n = 14) | PP group (n = 7) |
|--------------------|-----------------|--------------|-------------------|-------------------|-------------------|------------------|
| Heifers, n (%)     |                 | 44 (100)     | 11 (100)          | 12 (100)          | 14 (100)          | 7 (100)          |
| Median age (Years) |                 | 6 (4 to 9)   | 4 (4 to 7)        | 6 (4 to 9)        | 6.5 (4 to 8)      | 6 (5 to 8)       |
| Serum ELISA        | Positive, n (%) | 21 (47.7)    | 0 (0)             | 0 (0)             | 14 (100)          | 7 (100)          |
|                    | Negative, n (%) | 23 (52.3)    | 11 (100)          | 12 (100)          | 0 (0)             | 0                |
| Fecal PCR          | Positive, n (%) | 19 (43.2)    | 0 (0)             | 12 (100)          | 0 (0)             | 7 (100)          |
|                    | Negative, n (%) | 25 (56.8)    | 11 (100)          | 0 (0)             | 14 (100)          | 0 (0)            |

<https://doi.org/10.1371/journal.pone.0178336.t001>

and probes for each biomarker genes was confirmed by homology search (<https://www.ncbi.nlm.nih.gov/tools/primer-blast>) and agarose gel electrophoresis. The primers and probe used in this study are shown in Table 3. Sensitivity of real-time PCR reactions was confirmed by real-time PCR reaction using the known copy numbers calculated from purified PCR products which serially diluted from  $10^9$  to  $10^2$  copies of the templates. The real-time PCR was conducted for 45 cycles and  $C_T$  values were obtained. Negative control was included with no template. Real-time PCR was conducted by subjecting the samples to 95°C for 10 min, followed by 50 cycles of 95°C for 15 s and 60°C for 45 s. The expression level was determined by the  $2^{-\Delta\Delta C_t}$  method using the housekeeping gene,  $\beta$ -actin, as a reference.

### Statistical analysis

Data are reported as the means  $\pm$  the standard error of the mean (S.E.M.) of three independent experiments. Statistical significance was determined by ANOVA ( $p \leq 0.05$ ) with Dunnett’s post hoc test using the GraphPad Prism software version 7.00 (GraphPad Software, Inc., La Jolla, CA, USA). Receiver operator characteristics (ROC) curve analysis was conducted using the statistical package for social science (SPSS) software version 21.0 (SPSS Inc., Chicago, IL, USA) and the MedCalc Statistical Software version 13.3.3 (MedCalc Software, Ostend, Belgium). Higher AUC scores were considered to show better discriminatory powers as follows: excellent discriminatory power,  $AUC \geq 0.9$ ; good discriminatory power,  $0.8 \leq AUC < 0.9$ ; fair

**Table 2. Mean fold change of selected biomarker genes between infected animals and non-infected animals.**

| Accession No.  | Gene symbol     | Gene name                               | Location            | Mean fold change (log2 value) |         |           |         |           |         |
|----------------|-----------------|-----------------------------------------|---------------------|-------------------------------|---------|-----------|---------|-----------|---------|
|                |                 |                                         |                     | PN vs. NN                     | P value | NP vs. NN | P value | PP vs. NN | P value |
| NM_003234.2    | <i>Tfrc</i>     | Transferrin receptor (p90, CD71)        | Plasma membrane     | 1.6                           | 0.0005  | 1.3       | 0.0021  | 1.9       | 0.0004  |
| NM_174744      | <i>Mmp9</i>     | Matrix metalloproteinase 9              | Extracellular space | 2.9                           | 0.008   | 2.4       | 0.0342  | 3.6       | 0.0052  |
| NM_002964.4    | <i>S100a8</i>   | S100 calcium binding protein A8         | Cytoplasm           | 1.6                           | 0.0039  | 0.9       | 0.146   | 1.7       | 0.0069  |
| NM_002965.3    | <i>S100a9</i>   | S100 calcium binding protein A9         | Cytoplasm           | 0.4                           | 0.6228  | 0.6       | 0.2596  | 1.1       | 0.0548  |
| NM_174137      | <i>Serpine1</i> | Serpin peptidase inhibitor              | Extracellular space | 1.9                           | 0.0041  | 1.6       | 0.0183  | 2.6       | 0.0009  |
| NM_005143.3    | <i>Hp</i>       | Haptoglobin                             | Extracellular space | 2.3                           | 0.0031  | 3.2       | <0.0001 | 3.3       | 0.0003  |
| NM_174471.3    | <i>Timp1</i>    | Tissue inhibitor of metalloproteinase 1 | Extracellular space | 1.7                           | <0.0001 | 1.4       | 0.0002  | 0.5       | 0.415   |
| NM_001324544.1 | <i>Defb1</i>    | Defensin beta 1                         | Extracellular space | 5.2                           | 0.0009  | 3.3       | 0.039   | 1.8       | 0.5842  |
| NM_001115084.1 | <i>Defb10</i>   | Defensin beta 10                        | Extracellular space | 2.3                           | 0.0017  | 1.6       | 0.0313  | 1.6       | 0.1009  |

<https://doi.org/10.1371/journal.pone.0178336.t002>

**Table 3. Oligonucleotide sequence of primer and probe used for real-time PCR in this study.**

| Target gene     |       | Primer sequence(5' to 3')              | PCR product size(base pair) | Reference     |
|-----------------|-------|----------------------------------------|-----------------------------|---------------|
| <i>β-actin</i>  | F     | GCAAGCAGGAGTACGATGAG                   | 134                         | In this study |
|                 | R     | GCCATGCCAATCTCATCTCG                   |                             |               |
|                 | Probe | FAM-TTCTAGGCGGACTGTTAGCTGCGTTACAC-BHQ1 |                             |               |
| <i>Mmp9</i>     | F     | CCCGGATCAAGGATACAGCC                   | 177                         | [25]          |
|                 | R     | GGGCGAGGACCATACAGATG                   |                             |               |
|                 | Probe | HEX-AGTTTGCCACGCGCTGGGCTTAGAT-BHQ1     |                             |               |
| <i>Serpine1</i> | F     | CTGCGAAATTCAGGATGCGG                   | 191                         | [25]          |
|                 | R     | GGGTGAGAAAACCACGTTC                    |                             |               |
|                 | Probe | FAM-AGACTTTGGAGTGAAGTGTTCAGCAGG-BHQ1   |                             |               |
| <i>Timp1</i>    | F     | TCTGCAACTCCGATGTCGTC                   | 125                         | In this study |
|                 | R     | CCTCAAGGCACTGAACCCTT                   |                             |               |
|                 | Probe | HEX-GTTCGTGGGACCGCAGAAGTCAATG-BHQ1     |                             |               |
| <i>Hp</i>       | F     | CCAAGTACCAGGACGACACC                   | 131                         | In this study |
|                 | R     | ACCATACTCAGCCACAGCAC                   |                             |               |
|                 | Probe | FAM-ACGACAAGGAAGACGACACCTGGTATGC-BHQ1  |                             |               |
| <i>S100a8</i>   | F     | ATTTTGGGGAGACCTGGTGG                   | 124                         | [25]          |
|                 | R     | ACGGCGTGGTAATTCCTTT                    |                             |               |
|                 | Probe | FAM-TAACTCCCTGATTGACGTCTACCACAAG-BHQ1  |                             |               |
| <i>S100a9</i>   | F     | AGGCTACGGGAAGGGCAG                     | 134                         | [25]          |
|                 | R     | GCTGGCCTCCTGATTAGTGG                   |                             |               |
|                 | Probe | HEX-ATGGAGGTCACGGCCACAGCCAC-BHQ1       |                             |               |
| <i>Tfrc</i>     | F     | CAAAGTTTCTGCCAGCCAC                    | 188                         | [25]          |
|                 | R     | AACAGAAAGAGACCGCTGGG                   |                             |               |
|                 | Probe | HEX-TATCGGGACAGCAACTGGATCAGCAAAG-BHQ1  |                             |               |
| <i>Defb1</i>    | F     | CGAATGGAGGCATCTGTTG                    | 110                         | In this study |
|                 | R     | CTTCGCCTTCTTTACCACGA                   |                             |               |
|                 | Probe | FAM-TGCCCTGGACACATGATACAGATTGGCA-BHQ1  |                             |               |
| <i>Defb10</i>   | F     | ATCTAAGCTGCTGGGGGAAT                   | 97                          | In this study |
|                 | R     | CATTTTACTCGGGGCGCTAA                   |                             |               |
|                 | Probe | HEX-GTTTGCTTAACAGGTGCCCTGGAC-BHQ1      |                             |               |

<https://doi.org/10.1371/journal.pone.0178336.t003>

discriminatory power,  $0.7 \leq AUC < 0.8$ ; poor discriminatory power,  $AUC < 0.7$  [26]. The optimal cutoff values were calculated for each ROC curve while maximizing the Youden Index. Sensitivity and specificity were calculated based on cut-off value which showed highest AUC value in the ROC curve for each biomarker gene. A  $p < 0.05$  was considered to indicate statistical significance.

## Results

### Specificity of probe and primers

Specificity of primers and probes were confirmed by homology search. Also, to confirm the specificity for each biomarker genes, RT-PCR and agarose gel electrophoresis was performed. Single PCR band were confirmed for each biomarker gene and the  $\beta$ -actin gene and non-specific PCR product was not observed confirmed in the negative control with no cDNA sample (Fig 1).

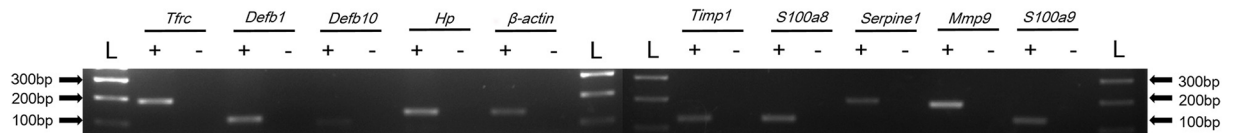

**Fig 1. Gel electrophoresis of PCR products of biomarkers genes and  $\beta$ -actin gene.** The biomarker genes and  $\beta$ -actin gene expression from bovine whole blood cDNA were confirmed by RT-PCR. A single PCR product was observed with expected size for each biomarker and  $\beta$ -actin gene. No band was observed in the PCR products of negative control without template DNA sample. In the figure (L) indicates 100bp DNA size marker, (+) indicates PCR product with template cDNA, (-) indicates PCR product without cDNA.

<https://doi.org/10.1371/journal.pone.0178336.g001>

### Sensitivity of real-time PCR reactions

Real-time PCR for the each biomarker gene was performed using the specific primers, probes and the purified PCR products. Amplification plots were presented for biomarker genes with increased template copy numbers from  $10^2$  to  $10^9$ . Amplification plot shows that fluorescence increase with increased template copy numbers (Fig 2). Also, real-time PCR was highly sensitive to detect low level of gene expression of biomarker genes (about  $10^2$  copies of the template cDNA) and negative control sample with no template DNA showed no increasing of fluorescence (Fig 2).

### Optimization of primer and probe concentrations

The optimal concentration of primer and probe concentration was determined by conducting real-time PCR with three primer and probe concentrations. The combination of forward and reverse primer at  $0.5\mu\text{M}$  for biomarker genes and  $\beta$ -actin gene revealed highest fluorescence and lowest  $C_T$  value. With this primer concentration,  $0.1\mu\text{M}$  of probe showed highest fluorescence and lowest  $C_T$  value. Combination of  $0.5\mu\text{M}$  forward and reverse primers and  $0.1\mu\text{M}$  probe concentration was used in further analysis.

### Gene expression level of biomarkers in MAP infected cattle

Experimental animals were divided into four groups based on the results of fecal PCR and serum ELISA conducted three times with a 6 month interval (Table 1). When compared with the non-infected NN group, expression of eight genes (*S100a8*, *Defb1*, *Defb10*, *Mmp9*, *Timp1*, *Hp*, *Serpine1*, and *Tfr*) showed higher expression in the PN group ( $p < 0.05$ ), while higher expression of seven other genes (*Timp1*, *Hp*, *Serpine1*, *Tfr*, *Defb1*, *Defb10*, and *Mmp9*) was observed in the NP group ( $p < 0.05$ ). Moreover, in the PP group, five genes (*S100a8*, *Mmp9*, *Hp*, *Serpine1*, and *Tfr*) showed significantly higher expression in the PP group ( $p < 0.05$ ). Four genes (*Tfr*, *Hp*, *Serpine1*, and *Mmp9*) were up-regulated in all infected groups, while three genes (*Timp1*, *Defb1*, and *Defb10*) were up-regulated in the PN group and the NP group, and *S100a8* was up-regulated in the PN group and the PP group (Fig 3). The mean fold changes of each biomarker are shown in Table 2.

### Discrimination between infected and non-infected animals

The AUC score of biomarkers was calculated during ROC analysis. In the PN group, the AUC scores of eight genes (*Timp1*, *Defb1*, *Tfr*, *Defb10*, *S100a8*, *Serpine1*, *Mmp9*, and *Hp*) were  $\geq 0.8$ . In the NP group, four genes (*Hp*, *Timp1*, *Tfr*, and *Serpine1*) had AUC scores  $\geq 0.8$ , while six genes (*S100a8*, *Hp*, *Serpine1*, *Tfr*, *Mmp9*, and *Defb10*) in the PP group had AUC scores  $\geq 0.8$  (Fig 4). When the diagnostic accuracies of individual biomarkers were calculated by ROC



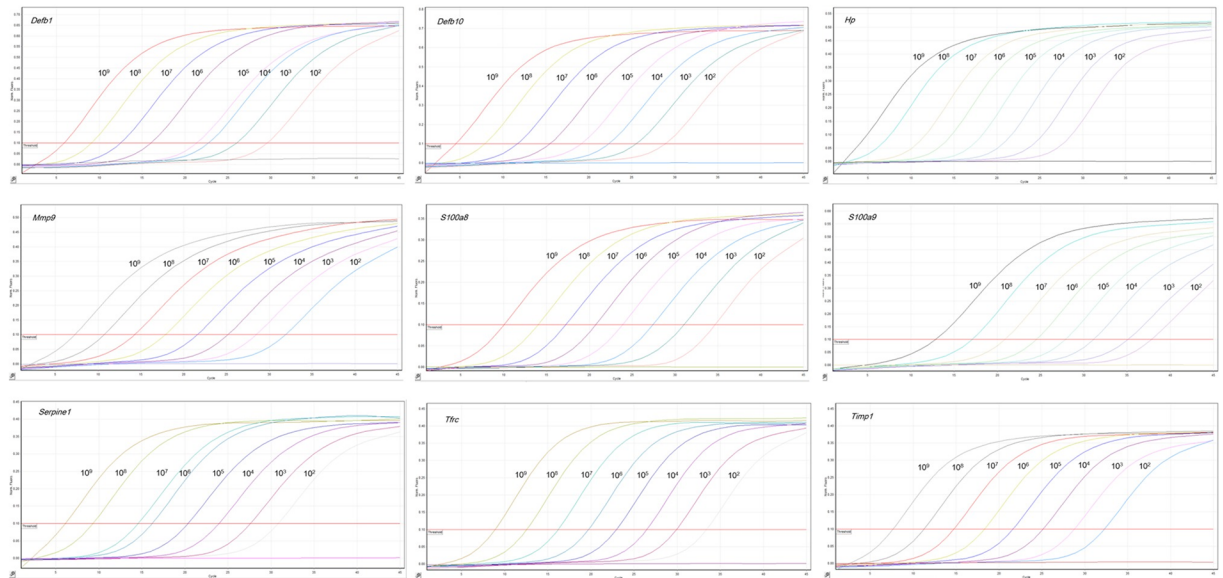

**Fig 2. Amplification plots of the biomarker genes in the real-time PCR.** Real-time PCR was conducted with PCR product that serially diluted 10-fold from  $10^9$  to  $10^2$  copy numbers. The emission of fluorescence was measured at each cycle numbers and negative control sample with no template DNA showed no increasing of fluorescence.

<https://doi.org/10.1371/journal.pone.0178336.g002>

curve analysis, the most accurate biomarker in the PN group was *Timp1*, with an AUC value of 0.985, while the most accurate biomarker in the NP group was *Hp*, with an AUC value of 0.942. Additionally, the most accurate biomarker in the PP group was *S100a8*, with an AUC value of 0.896. Similarly, in the PN group, *Timp1* showed the most accurate diagnostic performance, with a sensitivity of 100% and a specificity of 90.9%. In the NP group, *Hp* showed the most accurate diagnostic performance, with a sensitivity of 92.9% and a specificity of 90.9%. Moreover, *S100a8* showed the most accurate diagnostic performance in the PP group, with a sensitivity of 85.7% and a specificity of 90%. Other details pertaining to the diagnostic performance of biomarkers are shown in Table 4.

## Discussion

Early diagnosis of JD is the most important requirement to eradicate it from MAP-infected herds. However, current diagnostic methods are not sufficient for the diagnosis of subclinical stage animals that are actively dispersing MAP into the environment via fecal shedding [2]. Recently, several studies have attempted to diagnose subclinical stages of JD by analyzing host-pathogen interactions, including gene expression, miRNA, protein, and metabolites to MAP infection [17–20, 27]. Some of the studies have been conducted to identify prognostic biomarkers of JD by understanding host response to infection during the progression of JD [21, 28–31]. However, no attempt has been made to apply biomarkers as diagnostic tools. Therefore, the present study was conducted to diagnose MAP infection using a real-time PCR method based on potential prognostic biomarkers.

In the present study, several biomarkers showed good discriminatory ability ( $AUC \geq 0.8$ ) between MAP-infected cattle and non-infected cattle. Three genes (*Hp*, *Serpine1*, and *Tfr*) showed good discriminatory ability ( $AUC \geq 0.8$ ) in fecal PCR-positive and/or serum ELISA-positive groups (PN, NP, PP). Acute phase proteins are blood proteins that respond to infection and inflammation and have been used as diagnostic and prognostic biomarkers in veterinary medicine [32]. *Hp* is the major acute phase protein of cattle that responds to infection

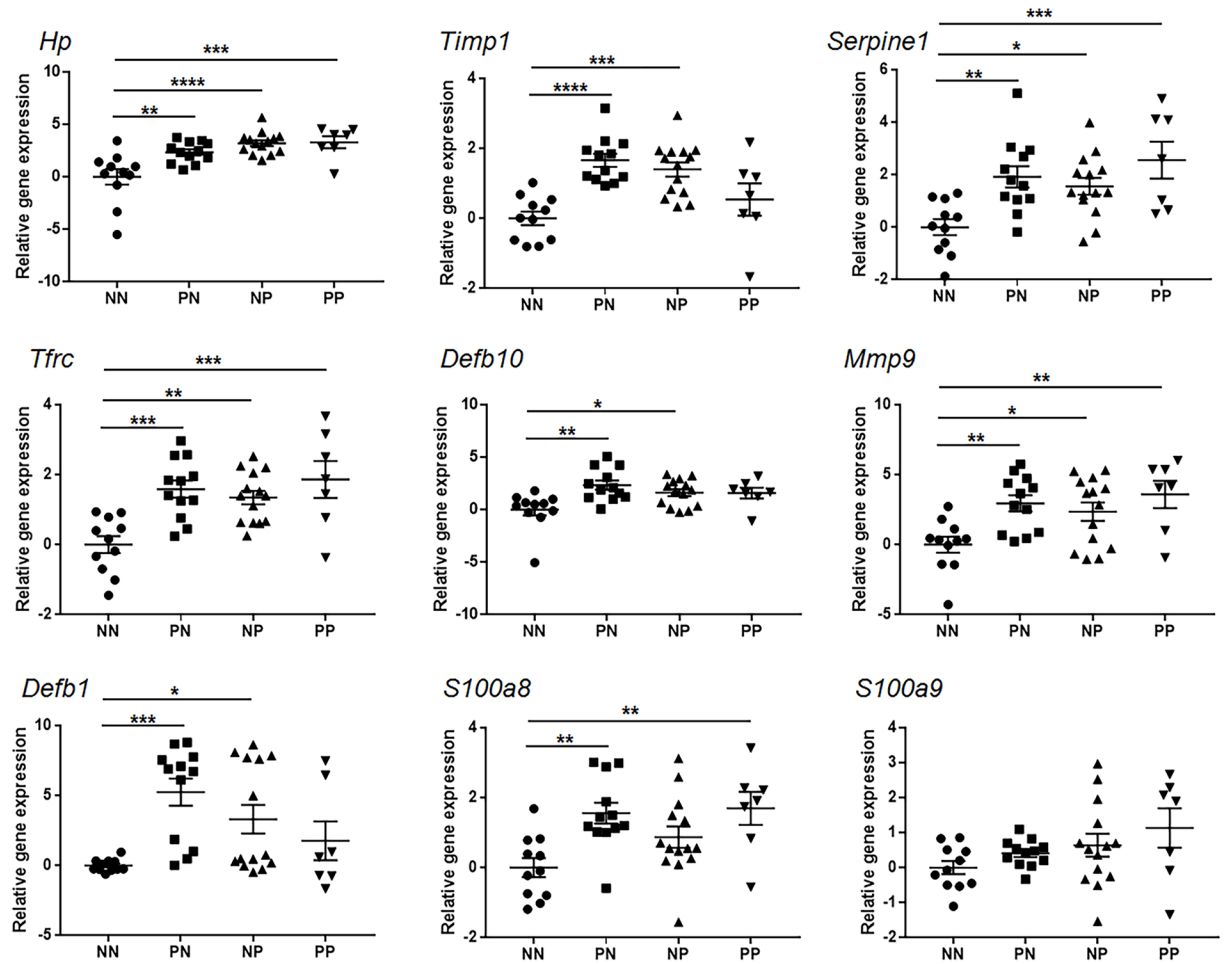

**Fig 3. Gene expression level of biomarkers in MAP-infected cattle.** The gene expression level of biomarker genes in cattle infected with *Mycobacterium avium* subspecies *paratuberculosis* compared to non-infected cattle. The data are shown as scatter plots with each dot representing a single animal. (\*,  $p < 0.05$  \*\*  $p < 0.01$  \*\*\*  $p < 0.001$  \*\*\*\*  $p < 0.0001$ ).

<https://doi.org/10.1371/journal.pone.0178336.g003>

[33, 34]. Moreover, *Hp* is known to exert anti-inflammatory activity by down-regulating neutrophil activity via inhibition of both lipoxygenase and cyclooxygenase [35] and to inhibit bacterial growth by interfering with iron acquisition by the host cell [36]. Moreover, *Hp* inhibits phagocytosis and intracellular killing of pathogens [37]. This anti-inflammatory response induced by *Hp* might reduce the harmful aspects of inflammation that could be destructive to the host itself. In that regard, up-regulation of *Hp* in MAP-infected animals might be a host response to early infection of MAP. *Hp* showed highest diagnostic accuracy for the NP group and whole infected animals, with AUC values of 0.942 and 0.901, respectively.

The initial response to MAP infection is dominant cell-mediated immunity, which is characterized by increasing interferon gamma release [38]. *Serpine1* is known to be an essential element of the fibrinolytic system that is related to blood coagulation [39]. *Serpine1* also acts as an inflammatory mediator by increasing the level of interferon gamma in blood to eliminate the pathogen in the early phase of an infectious disease [40, 41]. Therefore, increasing gene expression levels of *Serpine1* might be related to interferon gamma release due to MAP infection. In addition, expression of MAP0403 in MAP was increased in infected macrophages and MAC-T cells in recent study [42]. MAP0403 is kind of serine protease which served as a key element of



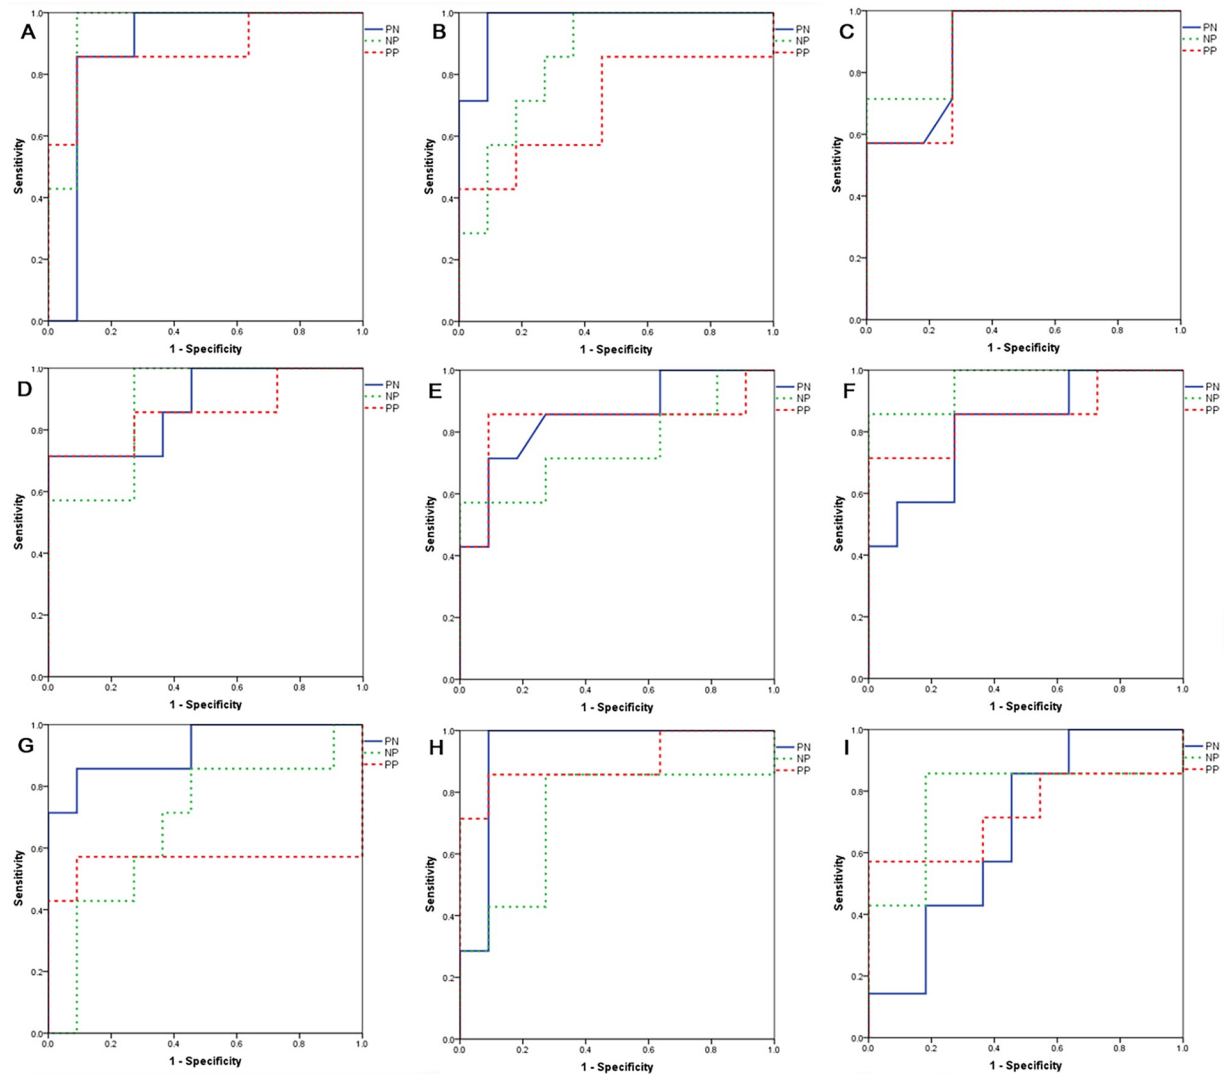

**Fig 4. Discriminatory ability of biomarkers between infected animals and control animals.** Receiver operator characteristics curves of biomarker genes in cattle infected with *Mycobacterium avium* subspecies *paratuberculosis* compared to non-infected cattle. (A) *Hp*; (B) *Timp1*; (C) *Serpine1*; (D) *TFRC*; (E) *Defb10*; (F) *Mmp9*; (G) *Defb1*; (H) *S100a8*; (I) *S100a9*

<https://doi.org/10.1371/journal.pone.0178336.g004>

the stress response network in intraphagosomal survival of MAP [42]. Up-regulation of *Serpine1* might be a counter response to intraphagosomal survival of MAP in host cells. The diagnostic accuracy of *Serpine1* was good ( $AUC \geq 0.8$ ) in all infected animals (PN, NP, PP group).

Iron is an important nutrient in innate immune response to bacterial pathogen [43]. *Tfrc*, which is one of the key elements of iron metabolism, transfers iron to cells from transferrin protein [43]. *Tfrc* is known to down-regulated in response to intracellular pathogen infection; however, its expression was significantly increased in all infected animals in the present study. This phenomenon might be related to the alternative iron acquisition system of MAP, which acts in a host-independent manner using mycobactin [44]; however, further studies are needed to confirm this.

*Mmp9* is a matrix metalloproteinase related to leukocyte migration to infection sites and tissue destruction if it is secreted in excess amounts [45]. The level of *Mmp9* was regulated by *Timp1*, which inhibits the activity of MMP9 [45]. *Mmp9* and *Timp1* are known to be up-

**Table 4. Diagnostic performance of biomarkers for diagnosis of JD.**

| Biomarker       | AUC       |           |           | P value   |           |           | Cut-off (fold change) |           |           | Sensitivity (%) |           |           | Specificity (%) |           |           |
|-----------------|-----------|-----------|-----------|-----------|-----------|-----------|-----------------------|-----------|-----------|-----------------|-----------|-----------|-----------------|-----------|-----------|
|                 | PN vs. NN | NP vs. NN | PP vs. NN | PN vs. NN | NP vs. NN | PP vs. NN | PN vs. NN             | NP vs. NN | PP vs. NN | PN vs. NN       | NP vs. NN | PP vs. NN | PN vs. NN       | NP vs. NN | PP vs. NN |
| <i>Tfrc</i>     | 0.909     | 0.89      | 0.857     | <0.0001   | <0.0001   | 0.0012    | >0.94                 | >0.47     | >0.94     | 75              | 92.9      | 71.4      | 100             | 72.7      | 100       |
| <i>Mmp9</i>     | 0.871     | 0.76      | 0.857     | <0.0001   | 0.0102    | 0.0012    | >0.455                | >2.73     | >2.73     | 91.7            | 57.1      | 71.4      | 72.7            | 100       | 100       |
| <i>S100a8</i>   | 0.894     | 0.721     | 0.896     | <0.0001   | 0.045     | <0.0001   | >0.829                | >-0.095   | >0.829    | 91.7            | 92.9      | 85.7      | 90.9            | 54.5      | 90        |
| <i>S100a9</i>   | 0.693     | 0.669     | 0.727     | 0.11      | 0.1315    | 0.1365    | >-0.07                | >0.511    | >0.856    | 91.7            | 57.1      | 57.1      | 54.5            | 81.8      | 100       |
| <i>Serpine1</i> | 0.875     | 0.864     | 0.883     | <0.0001   | <0.0001   | <0.0001   | >0.463                | >1.022    | >0.372    | 91.7            | 78.6      | 100       | 72.7            | 100       | 72.7      |
| <i>Hp</i>       | 0.864     | 0.942     | 0.883     | <0.0001   | <0.0001   | 0.0001    | >1.806                | >1.806    | >1.806    | 75              | 92.9      | 85.7      | 90.9            | 90.9      | 90.9      |
| <i>Timp1</i>    | 0.985     | 0.929     | 0.701     | <0.0001   | <0.0001   | 0.1815    | >0.682                | >0.682    | >1.022    | 100             | 78.6      | 42.9      | 90.9            | 90.9      | 100       |
| <i>Defb1</i>    | 0.955     | 0.786     | 0.558     | <0.0001   | 0.0024    | 0.7681    | >0.951                | >0.325    | >0.325    | 83.3            | 64.3      | 57.1      | 100             | 90.9      | 90.9      |
| <i>Defb10</i>   | 0.905     | 0.773     | 0.831     | <0.0001   | 0.0052    | 0.0118    | >1.154                | >1.815    | >1.154    | 83.3            | 57.1      | 85.7      | 90.9            | 100       | 90.9      |

<https://doi.org/10.1371/journal.pone.0178336.t004>

regulated in tuberculosis infection and have therefore been proposed as biomarkers for diagnosis of tuberculosis [46]. The simultaneous up-regulation of *Mmp9* and *Timp1* in infected animals might be caused by inflammatory conditions due to the early stages of MAP infection. Two genes (*Mmp9* and *Timp1*) showed good discriminatory ability (AUC≥0.8) in the PN group.

β-defensins exhibit antimicrobial functions, providing first protection against pathogens while playing an immune-modulation role [47]. Moreover, β-defensins interplay between innate and adaptive immune responses by down-regulating pro-inflammatory cytokines [48]. In the present study, *Defb1* and *Defb10* were significantly up-regulated in both the PN group and the NP group. Moreover, *Defb1* and *Defb10* showed excellent discriminatory ability (AUC≥0.9) in the PN group.

*S100a8* and *S100a9* are members of a calcium-binding cytosolic protein family that are located in the cytoplasm [49]. *S100a8* and *S100a9* form a heterodimer known as calprotectin that induces an inflammatory response via activation of TLR4 signaling [50]. Moreover, calprotectin is known to induce leukocyte migration in the early phase of bacterial infection [51]. In previous studies, serum S100A8/A9 have been proposed as prognostic biomarkers for disease progression and therapeutic response in inflammatory bowel diseases (IBD)[52, 53]. In the present study, *S100a8* showed good discriminatory ability (AUC≥0.8) in the PN and PP groups. However, gene expression of *S100a9* was not significant in all infected animals. Generally, *S100a8* and *S100a9* exist as heterodimers, but they also exist as homodimers [54]. The inconsistent gene expression levels between *S100a8* and *S100a9* might be related to the presence of the homodimer form.

An ideal biomarker for diagnosis of JD should be able to discriminate between infected and non-infected animals with high sensitivity and specificity. Our data showed that the response of eight biomarkers (*Hp*, *Timp1*, *Mmp9*, *Serpine1*, *Tfrc*, *S100a8*, *Defb1*, and *Defb10*) significantly discriminated MAP-infected and non-infected animals. Moreover, eight biomarkers (*Hp*, *Timp1*, *Mmp9*, *Serpine1*, *Tfrc*, *S100a8*, *Defb1*, and *Defb10*) showed good accuracy (AUC≥0.7) for diagnosis of subclinical animals. Additionally, four genes (*Timp1*, *S100a8*, *Defb1*, and *Defb10*) showed sensitivity over 80% and specificity over 90%. It is generally very difficult to detect subclinical stages of JD using currently available diagnostic methods such as bacterial culture, fecal PCR and serum ELISA [3]. Fecal PCR is a reliable method for diagnosis of MAP infection; however, intermittent shedding of MAP into feces because of immunological changes during the progress of disease can interfere with accurate diagnosis [55]. Moreover, although serum ELISA is a simple, fast and cost-effective method for diagnosis of JD, it is

known to have low sensitivity for MAP-infected animals that do not show clinical signs [56]. However, our real-time PCR method based on biomarkers showed relatively precise diagnostic results. In that regard, combination of eight biomarker genes (*Hp*, *Timp1*, *Mmp9*, *Serpine1*, *Tfrc*, *S100a8*, *Defb1*, and *Defb10*) might be used for diagnosis of JD, including in subclinical stage animals.

In conclusion, a real-time PCR method was developed based on eight biomarkers that can be used as a new diagnostic tool for JD with good diagnostic performance. Moreover, this real-time PCR based on biomarkers might be used for diagnosis of JD, especially in subclinical stage animals that cannot be detected by current diagnostic methods. Although our developed diagnostic method might be applied to field test, this method will be more concreted if possible limitations in our study such as the low number of samples and sampling times would be addressed in future studies by including large scale field investigations.

## Acknowledgments

We are grateful to all our research participants, and staff of the National Institute of Animal Science, who contributed to this study.

## Author Contributions

**Conceptualization:** HEP HSY.

**Data curation:** HEP.

**Formal analysis:** HEP.

**Funding acquisition:** HSY.

**Investigation:** HEP HTP YHJ HSY.

**Methodology:** HEP HTP.

**Project administration:** YHJ HSY.

**Resources:** YHJ HSY.

**Software:** HEP.

**Supervision:** HSY.

**Validation:** HEP HTP.

**Visualization:** HEP.

**Writing – original draft:** HEP HSY.

**Writing – review & editing:** HEP HSY.

## References

1. Whitlock RH, Buergelt C. Preclinical and clinical manifestations of paratuberculosis (including pathology). *Vet Clin North Am Food Anim Pract.* 1996; 12: 345–3 PMID: [8828109](#)
2. Tiwari A, VanLeeuwen JA, McKenna SL, Keefe GP, Barkema HW. Johne's disease in Canada Part I: clinical symptoms, pathophysiology, diagnosis, and prevalence in dairy herds. *Can Vet J.* 2006; 47: 874–882. PMID: [17017652](#)
3. Mortier RA, Barkema HW, De Buck J. Susceptibility to and diagnosis of *Mycobacterium avium* subspecies *paratuberculosis* infection in dairy calves: A review. *Prev Vet Med.* 2015; 121(3–4): 189–98. <https://doi.org/10.1016/j.prevetmed.2015.08.011> PMID: [26321657](#)

4. Whittington RJ, Whittington AM, Waldron A, Begg DJ, de Silva K, Purdie AC, et al. Development and validation of a liquid medium (M7H9C) for routine culture of *Mycobacterium avium* subsp. *paratuberculosis* to replace modified Bactec 12B medium. *J Clin Microbiol*. 2013; 51(12): 3993–4000 <https://doi.org/10.1128/JCM.01373-13> PMID: 24048541
5. Bögli-Stuber K, Kohler C, Seitert G, Glanemann B, Antognoli MC, Salman MD, et al. Detection of *Mycobacterium avium* subspecies *paratuberculosis* in swiss dairy cattle by real-time PCR and culture: a comparison of the two assays. *J Appl Microbiol*. 2005; 99: 587–597. <https://doi.org/10.1111/j.1365-2672.2005.02645.x> PMID: 16108801
6. Sockett DC, Carr DJ, Collins MT. Evaluation of conventional and radiometric fecal culture and a commercial DNA probe for diagnosis of *Mycobacterium paratuberculosis* infections in cattle. *Can J Vet Res*. 1992; 56(2): 148–53. PMID: 1591658
7. Sevilla IA, Garrido JM, Molina E, Geijo MV, Elguezabal N, Vázquez P, et al. Development and evaluation of a novel multicopy-element-targeting triplex PCR for detection of *Mycobacterium avium* subsp. *paratuberculosis* in feces. *Appl Environ Microbiol*. 2014; 80(12): 3757–68. <https://doi.org/10.1128/AEM.01026-14> PMID: 24727272
8. Wells SJ, Collins MT, Faaberg KS, Wees C, Tavornpanich S, Petrini KR, et al. Evaluation of a rapid fecal PCR test for detection of *Mycobacterium avium* subsp. *paratuberculosis* in dairy cattle. *Clin Vaccine Immunol*. 2006; 13(10): 1125–30. <https://doi.org/10.1128/COI.00236-06> PMID: 16928884
9. Cousins DV, Whittington R, Marsh I, Masters A, Evans RJ, Kluver P. *Mycobacteria* distinct from *Mycobacterium avium* subsp. *paratuberculosis* isolated from the faeces of ruminants possess IS900-like sequences detectable IS900 polymerase chain reaction: implications for diagnosis. *Mol Cell Probes*. 1999; 13(6): 431–42. <https://doi.org/10.1006/mcpr.1999.0275> PMID: 10657148
10. Englund S, Bölske G, Johansson KE. An IS900-like sequence found in a *Mycobacterium sp.* other than *Mycobacterium avium* subsp. *paratuberculosis*. *FEMS Microbiol Lett*. 2002; 209: 267–271. PMID: 12007816
11. Al Hajri SM, Alluwaimi AM. ELISA and PCR for evaluation of subclinical paratuberculosis in the Saudi dairy herds. *Vet Microbiol*. 2007; 121: 384–385. <https://doi.org/10.1016/j.vetmic.2007.01.025> PMID: 17339085
12. Strimbu K, Tavel JA. What are biomarkers? *Curr Opin HIV AIDS*. 2010; 5(6): 463–6. <https://doi.org/10.1097/COH.0b013e32833ed177> PMID: 20978388
13. Dehnad A, Ravindran R, Subbian S, Khan IH. Development of immune-biomarkers of pulmonary tuberculosis in a rabbit model. *Tuberculosis (Edinb)*. 2016; 101: 1–7.
14. Goyal N, Kashyap B, Singh NP, Kaur IR. Neopterin and oxidative stress markers in the diagnosis of extrapulmonary tuberculosis. *Biomarkers*. 2016; 8: 1–6.
15. Walker SJ, Beavers DP, Fortunato J, Kringsman A. A Putative Blood-Based Biomarker for Autism Spectrum Disorder-Associated Ileocolitis. *Sci Rep*. 2016; 6: 35820. <https://doi.org/10.1038/srep35820> PMID: 27767057
16. Waters WR, Maggioli MF, Palmer MV, Thacker TC, McGill JL, Vordermeier HM, et al. Interleukin-17A as a Biomarker for Bovine Tuberculosis. *Clin Vaccine Immunol*. 2015; 23: 168–80. <https://doi.org/10.1128/COI.00637-15> PMID: 26677202
17. David J, Barkema HW, Mortier R, Ghosh S, le Guan L, De Buck J. Gene expression profiling and putative biomarkers of calves 3 months after infection with *Mycobacterium avium* subspecies *paratuberculosis*. *Vet Immunol Immunopathol*. 2014; 160: 107–117. <https://doi.org/10.1016/j.vetimm.2014.04.006> PMID: 24841487
18. David J, Barkema HW, le Guan L, De Buck J. Gene-expression profiling of calves 6 and 9 months after inoculation with *Mycobacterium avium* subspecies *paratuberculosis*. *Vet Res*. 2014; 45: 96. <https://doi.org/10.1186/s13567-014-0096-5> PMID: 25294045
19. De Buck J, Shaykhtudinov R, Barkema HW, Vogel HJ. Metabolomic profiling in cattle experimentally infected with *Mycobacterium avium* subsp. *paratuberculosis*. *PLoS One*. 2014; 9(11): e111872. <https://doi.org/10.1371/journal.pone.0111872> PMID: 25372282
20. You Q, Verschoor CP, Pant SD, Macri J, Kirby GM, Karrow NA. Proteomic analysis of plasma from Holstein cows testing positive for *Mycobacterium avium* subsp. *paratuberculosis* (MAP). *Vet Immunol Immunopathol*. 2012; 148(3–4): 243–51. <https://doi.org/10.1016/j.vetimm.2012.05.002> PMID: 22633222
21. Cha SB, Yoo A, Park HT, Sung KY, Shin MK, Yoo HS. Analysis of transcriptional profiles to discover biomarker candidates in *Mycobacterium avium* subsp. *paratuberculosis*-infected macrophages, RAW 264.7. *J Microbiol Biotechnol*. 2013; 23: 1167–1175. PMID: 23727801
22. Shin MK, Park HT, Shin SW, Jung M, Im YB, Park HE, et al. Whole-blood gene-expression profiles of cows infected with *Mycobacterium avium* subsp. *paratuberculosis* reveal changes in immune response and lipid metabolism. *J Microbiol Biotechnol*. 2015; 25: 255–267. PMID: 25248984

23. Shin MK, Park H, Shin SW, Jung M, Lee SH, Kim DY, et al. Host Transcriptional Profiles and Immunopathologic Response following *Mycobacterium avium* subsp. *paratuberculosis* Infection in Mice. PLoS One. 2015; 10(10): e0138770. <https://doi.org/10.1371/journal.pone.0138770> PMID: 26439498
24. Park HT, Shin MK, Park HE, Cho YI, Yoo HS. PCR-based detection of *Mycobacterium avium* subsp. *paratuberculosis* infection in cattle in South Korea using fecal samples. J Vet Med Sci. 2016; 78(9): 1537–1540. <https://doi.org/10.1292/jvms.15-0271> PMID: 27301582
25. Park HE, Shin MK, Park HT, Jung M, Cho YI, Yoo HS. Gene expression profiles of putative biomarker candidates in *Mycobacterium avium* subsp. *paratuberculosis*-infected cattle. Pathog Dis. 2016; 74(4): ftw022. <https://doi.org/10.1093/femspd/ftw022> PMID: 27029383
26. Muller MP, Tomlinson G, Marrie TJ, Tang P, McGeer A, Low DE, et al. Can routine laboratory tests discriminate between severe acute respiratory syndrome and other causes of community-acquired pneumonia? Clin Infect Dis. 2005; 40(8): 1079–86. <https://doi.org/10.1086/428577> PMID: 15791504
27. Malvisi M, Palazzo F, Morandi N, Lazzari B, Williams JL, Pagnacco G, et al. Responses of Bovine Innate Immunity to *Mycobacterium avium* subsp. *paratuberculosis* Infection Revealed by Changes in Gene Expression and Levels of MicroRNA. PLoS One. 2016; 11(10): e0164461. <https://doi.org/10.1371/journal.pone.0164461> PMID: 27760169
28. Plain KM, de Silva K, Earl J, Begg DJ, Purdie AC, Whittington RJ. Indoleamine 2,3-dioxygenase, tryptophan catabolism, and *Mycobacterium avium* subsp. *paratuberculosis*: a model for chronic mycobacterial infections. Infect Immun. 2011; 79(9): 3821–32. <https://doi.org/10.1128/IAI.05204-11> PMID: 21730087
29. Seth M, Lamont EA, Janagama HK, Widdel A, Vulchanova L, Stabel JR, et al. Biomarker discovery in subclinical mycobacterial infections of cattle. PLoS One. 2009; 4(5): e5478. <https://doi.org/10.1371/journal.pone.0005478> PMID: 19424492
30. Verschoor CP, Pant SD, You Q, Kelton DF, Karrow NA. Gene expression profiling of PBMCs from Holstein and Jersey cows sub-clinically infected with *Mycobacterium avium* ssp. *paratuberculosis*. Vet Immunol Immunopathol. 2010; 137: 1–11 <https://doi.org/10.1016/j.vetimm.2010.03.026> PMID: 20447698
31. Wang X, Wang H, Aodon-geril, Shu Y, Momotani Y, Nagata R, et al. Decreased expression of matrix metalloproteinase-9 and increased expression of tissue inhibitors of matrix metalloproteinase-1 in *paratuberculosis*-infected cattle in the ELISA-negative subclinical stage. Anim Biotechnol. 2011; 22(1): 44–9. <https://doi.org/10.1080/10495398.2010.536096> PMID: 21328105
32. Eckersall PD, Bell R. Acute phase proteins: Biomarkers of infection and inflammation in veterinary medicine. Vet J. 2010; 185(1): 23–7. <https://doi.org/10.1016/j.tvjl.2010.04.009> PMID: 20621712
33. Seppä-Lassila L, Orro T, Lassen B, Lasonen R, Autio T, Pelkonen S, et al. Intestinal pathogens, diarrhoea and acute phase proteins in naturally infected dairy calves. Comp Immunol Microbiol Infect Dis. 2015; 41: 10–6. <https://doi.org/10.1016/j.cimid.2015.05.004> PMID: 26264522
34. El-Deeb WM, Elmoslemany AM. Acute phase proteins as biomarkers of urinary tract infection in dairy cows: diagnostic and prognostic accuracy. Jpn J Vet Res. 2016; 64(1): 57–66. PMID: 27348889
35. Saeed SA, Ahmad N, Ahmed S. Dual inhibition of cyclooxygenase and lipoyxygenase by human haptoglobin: its polymorphism and relation to hemoglobin binding. Biochem Biophys Res Commun. 2007; 353(4): 915–20. <https://doi.org/10.1016/j.bbrc.2006.12.092> PMID: 17198677
36. Eaton JW, Brandt P, Mahoney JR, Lee JT Jr. Haptoglobin: a natural bacteriostat. Science. 1982; 215(4533): 691–3. PMID: 7036344
37. Rossbacher J, Wagner L, Pasternack MS. Inhibitory effect of haptoglobin on granulocyte chemotaxis, phagocytosis and bactericidal activity. Scand J Immunol 1999; 50(4): 399–404. PMID: 10520180
38. Stabel JR. Transitions in immune responses to *Mycobacterium paratuberculosis*. Vet Microbiol. 2000; 77(3–4): 465–73. PMID: 11118731
39. Furie B, Furie BC. The molecular basis of blood coagulation. Cell. 1988; 53(4): 505–18. PMID: 3286010
40. Lim JH, Woo CH, Li JD. Critical role of type 1 plasminogen activator inhibitor (PAI-1) in early host defense against nontypeable *Haemophilus influenzae* (NTHi) infection. Biochem Biophys Res Commun. 2011; 414(1): 67–72. <https://doi.org/10.1016/j.bbrc.2011.09.023> PMID: 21945446
41. Wang Z, Zhao Q, Han Y, Zhang D, Zhang L, Luo D. PAI-1 and IFN- $\gamma$  in the regulation of innate immune homeostasis during sublethal yersiniosis. Blood Cells Mol Dis. 2013; 50(3): 196–201. <https://doi.org/10.1016/j.bcmd.2012.11.005> PMID: 23218129
42. Kugadas A, Lamont EA, Bannantine JP, Shoyama FM, Brenner E, Janagama HK, et al. A *Mycobacterium avium* subsp. *paratuberculosis* Predicted Serine Protease Is Associated with Acid Stress and Intraphagosomal Survival. Front Cell Infect Microbiol. 2016; 6: 85. <https://doi.org/10.3389/fcimb.2016.00085> PMID: 27597934



43. Johnson EE, Wessling-Resnick M. Iron metabolism and the innate immune response to infection. *Microbes Infect.* 2012; 14(3): 207–16. <https://doi.org/10.1016/j.micinf.2011.10.001> PMID: 22033148
44. Wang J, Moolji J, Dufort A, Staffa A, Domenech P, Reed MB, et al. Iron Acquisition in *Mycobacterium avium* subsp. *paratuberculosis*. *J Bacteriol.* 2015; 198(5): 857–66. <https://doi.org/10.1128/JB.00922-15> PMID: 26712939
45. Goetzl EJ, Banda MJ, Leppert D. Matrix metalloproteinases in immunity. *J Immunol.* 1996; 156(1): 1–4. PMID: 8598448
46. Chen Y, Wang J, Ge P, Cao D, Miao B, Robertson I, et al. Tissue inhibitor of metalloproteinases 1, a novel biomarker of tuberculosis. *Mol Med Rep.* 2017; 15(1): 483–487. <https://doi.org/10.3892/mmr.2016.5998> PMID: 27959391
47. Meade KG, Cormican P, Narciandi F, Lloyd A, O'Farrelly C. Bovine  $\beta$ -defensin gene family: opportunities to improve animal health? *Physiol Genomics.* 2014; 46(1): 17–28. <https://doi.org/10.1152/physiolgenomics.00085.2013> PMID: 24220329
48. Allaker RP. Host defence peptides—a bridge between the innate and adaptive immune responses. *Trans R Soc Trop Med Hyg.* 2008; 102(1): 3–4. <https://doi.org/10.1016/j.trstmh.2007.07.005> PMID: 17727907
49. Schiopu A, Cotoi OS. S100A8 and S100A9: DAMPs at the crossroads between innate immunity, traditional risk factors, and cardiovascular disease. *Mediators Inflamm.* 2013; 2013: 828354. <https://doi.org/10.1155/2013/828354> PMID: 24453429
50. Vogl T, Tenbrock K, Ludwig S, Leukert N, Ehrhardt C, van Zoelen MA, et al. Mrp8 and Mrp14 are endogenous activators of Toll-like receptor 4, promoting lethal, endotoxin-induced shock. *Nat Med.* 2007; 13(9): 1042–9. <https://doi.org/10.1038/nm1638> PMID: 17767165
51. Achouiti A, Vogl T, Urban CF, Röhm M, Hommes TJ, van Zoelen MA, et al. Myeloid-related protein-14 contributes to protective immunity in gram-negative pneumonia derived sepsis. *PLoS Pathog.* 2012; 8(10): e1002987. <https://doi.org/10.1371/journal.ppat.1002987> PMID: 23133376
52. Leach ST, Yang Z, Messina I, Song C, Geczy CL, Cunningham AM, et al. Serum and mucosal S100 proteins, calprotectin (S100A8/S100A9) and S100A12, are elevated at diagnosis in children with inflammatory bowel disease. *Scand J Gastroenterol.* 2007; 42(11): 1321–31. <https://doi.org/10.1080/00365520701416709> PMID: 17852869
53. Cayatte C, Joyce-Shaikh B, Vega F, Boniface K, Grein J, Murphy E, et al. Biomarkers of Therapeutic Response in the IL-23 Pathway in Inflammatory Bowel Disease. *Clin Transl Gastroenterol.* 2012; 3:e10. <https://doi.org/10.1038/ctg.2012.2> PMID: 23238132
54. Vogl T, Ludwig S, Goebeler M, Strey A, Thorey IS, Reichelt R, et al. MRP8 and MRP14 control microtubule reorganization during transendothelial migration of phagocytes. *Blood.* 2004; 104: 4260–8. <https://doi.org/10.1182/blood-2004-02-0446> PMID: 15331440
55. Mitchell RM, Schukken Y, Koets A, Weber M, Bakker D, Stabel J, et al. Differences in intermittent and continuous fecal shedding patterns between natural and experimental *Mycobacterium avium* subspecies *paratuberculosis* infections in cattle. *Vet Res.* 2015; 19: 46–66.
56. Nielsen SS, Toft N. Ante mortem diagnosis of paratuberculosis: a review of accuracies of ELISA, interferon-gamma assay and faecal culture techniques. *Vet Microbiol.* 2008; 129: 217–35. <https://doi.org/10.1016/j.vetmic.2007.12.011> PMID: 18255239
